# Supplementary material for: Muscle stem cells contribute to long‐term tissue repletion following surgical sepsis
Source: PubMed Central journal article supplement — J Cachexia Sarcopenia Muscle. 2023 Mar 8;14(3):1424–40. doi: 10.1002/jcsm.13214 (PMC10235871; doi:10.1002/jcsm.13214), 2023-03-08
Supplement: JCSM-14-1424-s001.pdf [file JCSM-14-1424-s001.pdf]

# Supplemental Figure 1

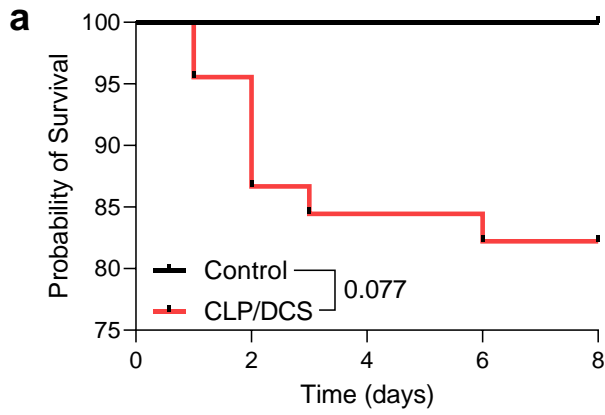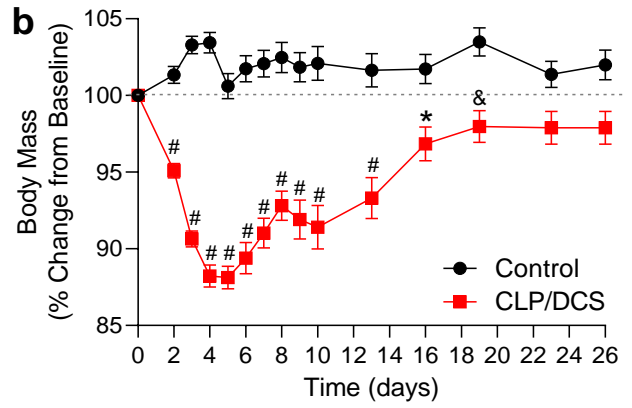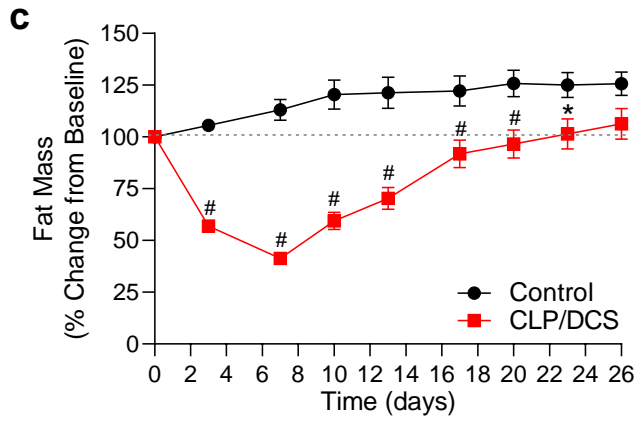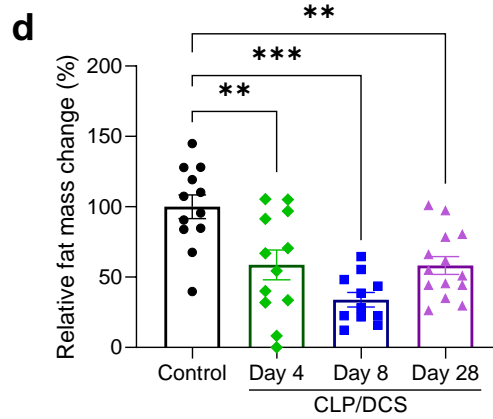

**Supplemental Figure 1. Additional characterization of acute survival and fat mass loss in CLP/DCS mice.** Combined experiments (A) acute Kaplan-Meier survival for control and CLP/DCS. Control and CLP/DCS data subset is depicted in Figure 1A. (B-C) Control and CLP/DCS percent change from baseline in body weight (B) and fat mass (C). Data from mouse MRI on day 3 or 4 is represented as day 3. (D) Harvested wet weight, as change in percent of control, of fat pad normalized to baseline body weight in control and CLP/DCS day 4, 8, and 28. Data from harvested fat mass on days 27 or 28 is represented on graph as day 28. A = log-rank test. B-C = Two-way ANOVA with Bonferroni multiple comparisons (BMC). D = One-way ANOVA with BMC. Significance: \* $p < 0.05$ , \*\*/ $p < 0.01$ , \*\*\*/# $p < 0.001$ . A,  $n = 16-45$ . B,  $n = 16-45$ . C,  $n = 12-14$ . Each  $n =$  one mouse.

# Supplemental Figure 2

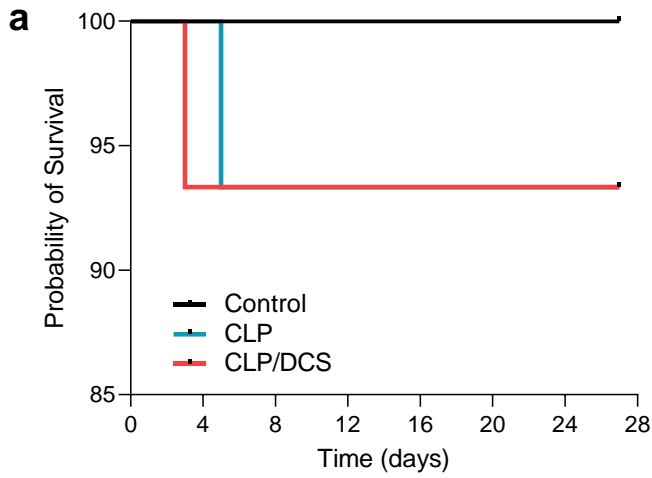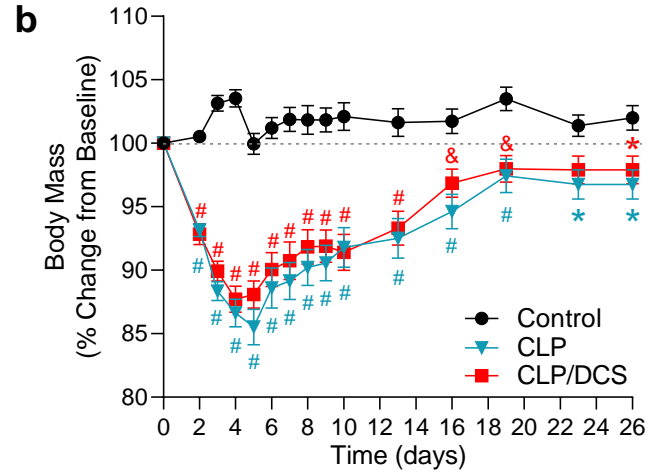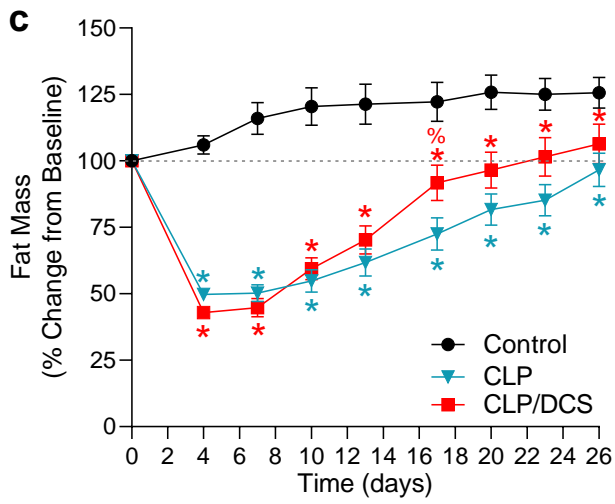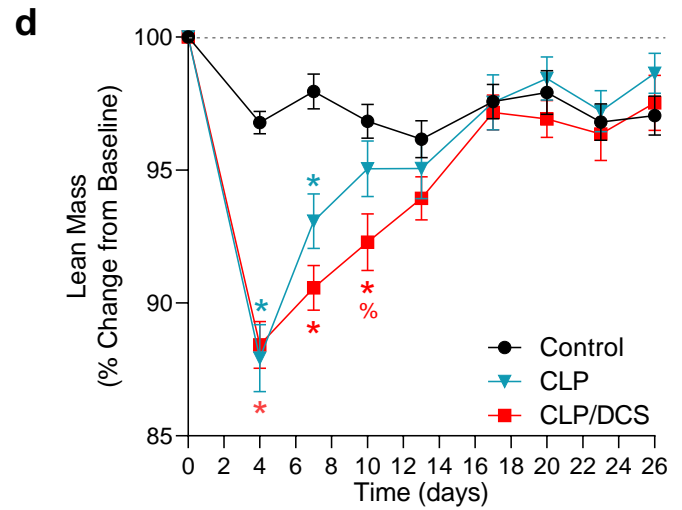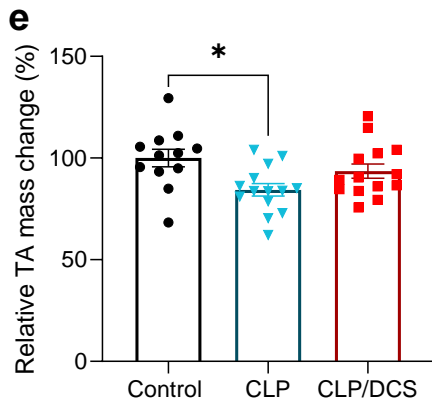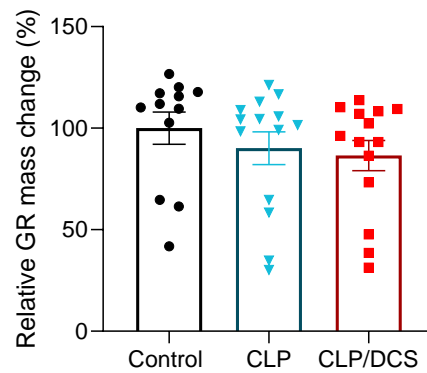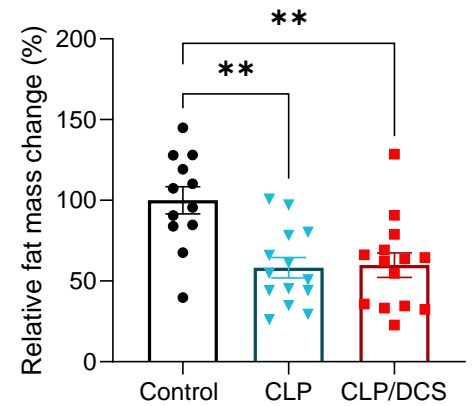

**Supplemental Figure 2. Role of CLP versus CLP/DCS in survival, body, lean, and fat mass.** (A)

Kaplan-Meier survival curve of control, cecal ligation and puncture (CLP), and CLP and daily chronic stress (CLP/DCS) mice to experiment endpoint. (B-D) Control, CLP, and CLP/DCS percent change from baseline in body mass (B), fat mass (C), and lean mass (D). (E) Harvested wet weight, as change in percent of control, of tibialis anterior (TA), gastrocnemius (GR), and fat pad normalized to baseline body weight, respectively, in control, CLP, and CLP/DCS groups. Data from harvested TA, GR, and fat mass on days 27 or 28 is represented on graph as day 28. Control and CLP/DCS data subset is also depicted in Figure 1A and C-D and Supplemental Figure 1B-D. A = log-rank test. B - D = Two-way ANOVA with BMC. E = One-way ANOVA with BMC. B, significance: \* $p < 0.05$ , & $p < 0.01$ , # $p < 0.001$  versus control. C - D, significance: \*CLP or CLP/DCS versus control, %CLP versus CLP/CS; see supplemental tables 2 and 3 for all p-value comparisons in panel C and D, respectively. N = 12-16.

# Supplemental Figure 3

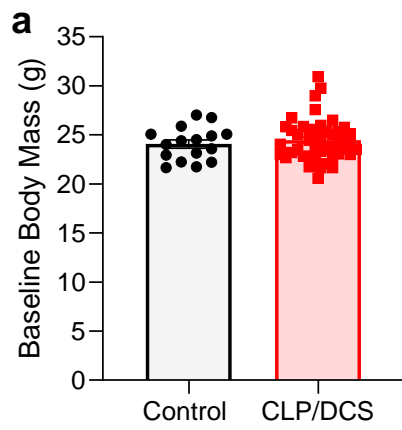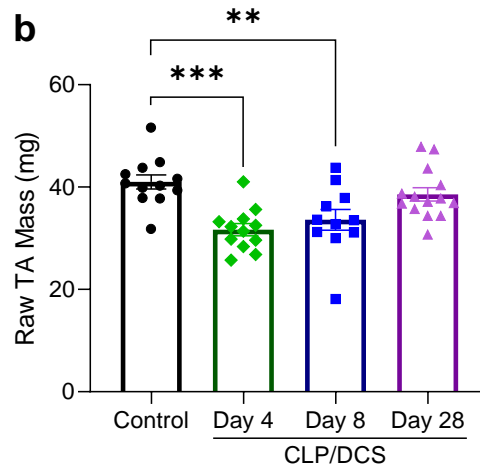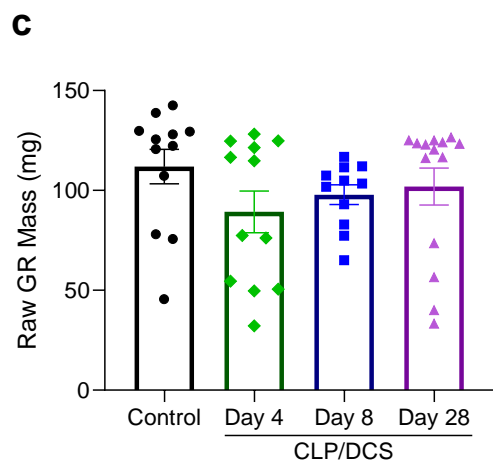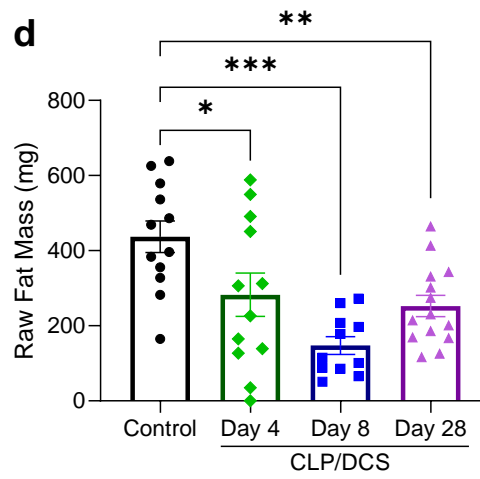

**Supplemental Figure 3. Raw muscle and fat masses from control and CLP/DCS mice across time.** (A) Baseline body mass between control and all CLP/DCS mice from combined experiments where data is represented in Figure 1, Supplemental Figure 1, and 2. (B-D) Control and CLP/DCS raw mass of harvested TA (B), GR (C), and fat (D). A = Student's unpaired t-test. B – D = One-way ANOVA with BMC. Significance is \* $p < 0.05$ , \*\* $p < 0.01$ , \*\*\* $p < 0.001$ . A,  $n = 16-45$ . B – D,  $n = 11-14$ . Each  $n =$  one mouse.

# Supplemental Figure 4

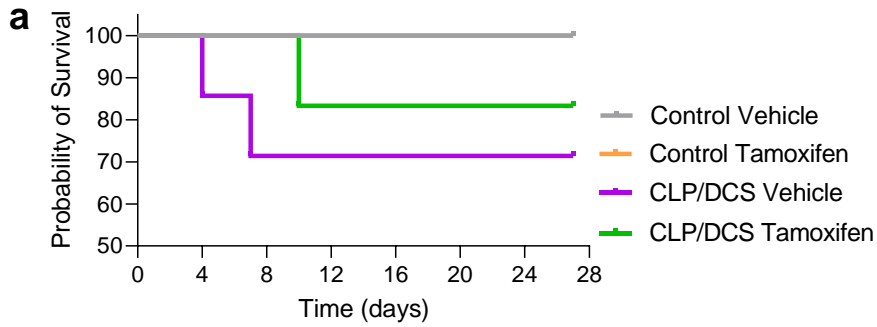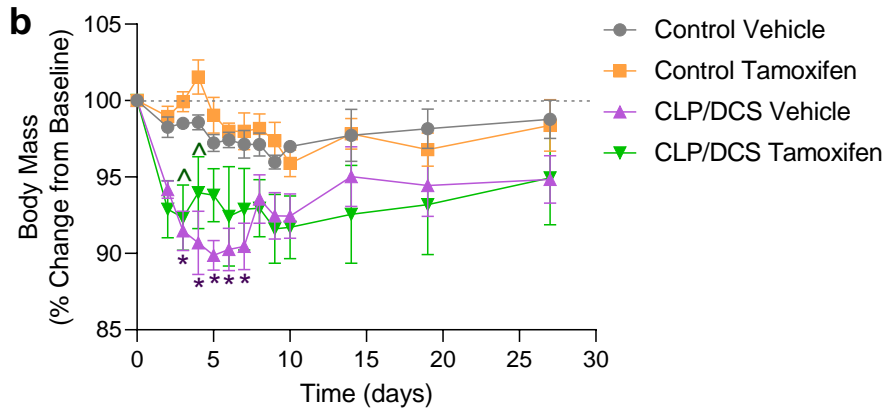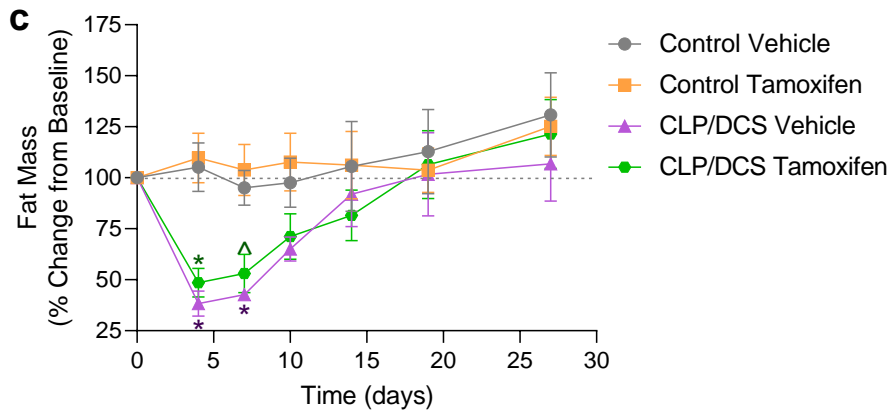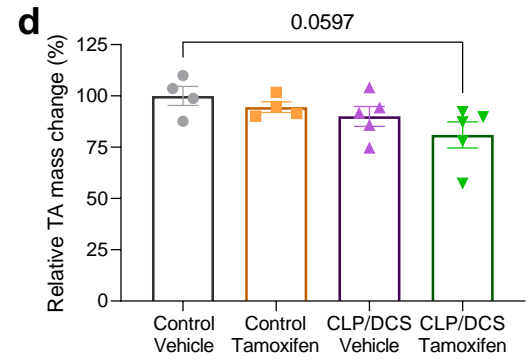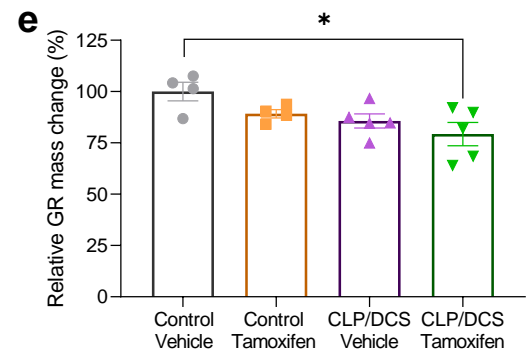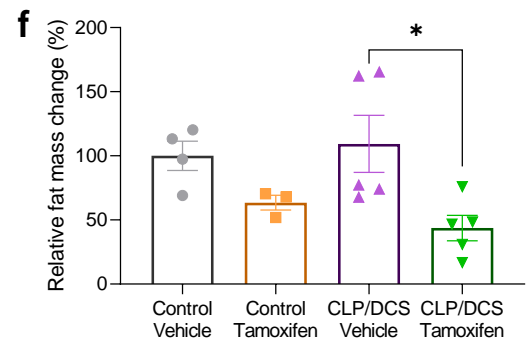

**Supplemental Figure 4. Satellite cell reduction during sepsis does not affect mouse fat mass or body weight.** (A-F) Pax7-DTA vehicle or tamoxifen treated control or CLP/DCS mice (A) Kaplan-Meier survival curve, (B) percent change in weight from baseline, (C) percent change in fat mass from baseline, and percent change of controls of harvested wet weights normalized to initial body weight of (D) TA, (E) GR, or (F) fat pad. A = log-rank test. B - C = Two-way ANOVA with BMC where: \*significant vs. Control Vehicle and Control Tamoxifen and ^significant vs. Control Tamoxifen; n = 4-7. D - F = One-way ANOVA with BMC where significance is \*p<0.05, \*\*p<0.01, \*\*\*p<0.001; n = 3-5. Each n = one mouse.



# Supplemental Figure 5

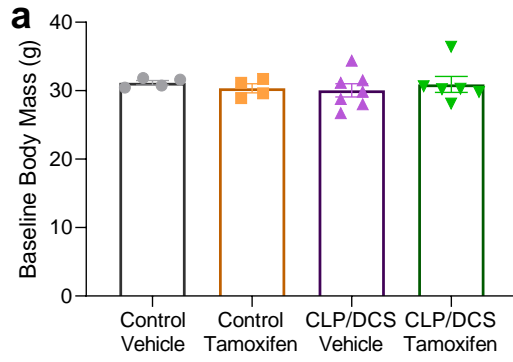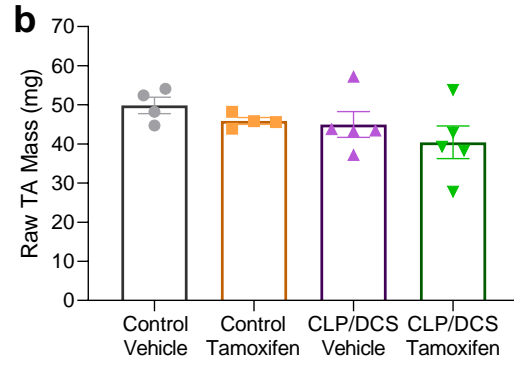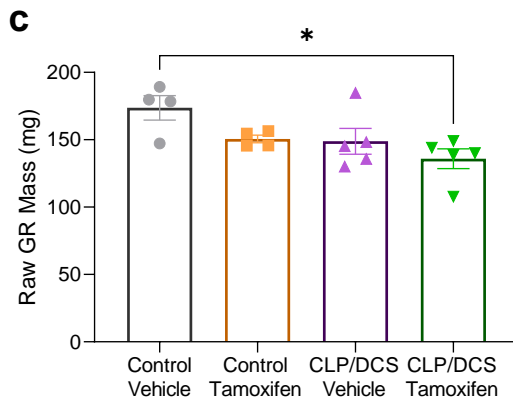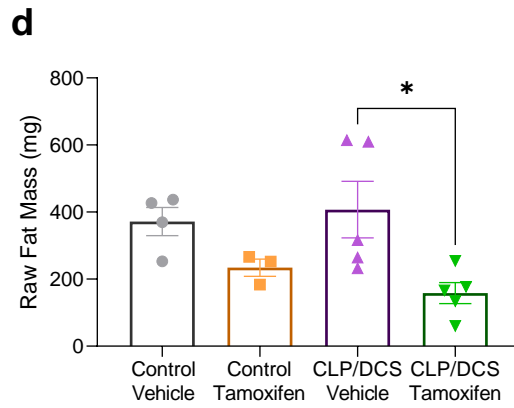

**Supplemental Figure 5. Control and CLP/DCS reduction of satellite cell experiment raw muscle and fat masses.** (A) Baseline body mass between control and CLP/DCS mice treated with vehicle or tamoxifen. (B-D) Control and CLP/DCS vehicle or tamoxifen treated raw mass of harvested TA (B), GR (C), and fat (D). A - D = One-way ANOVA with BMC where significance is \* $p < 0.05$ , \*\* $p < 0.01$ , \*\*\* $p < 0.001$ . N = 4-7. Each n = one mouse.

# Supplemental Figure 6

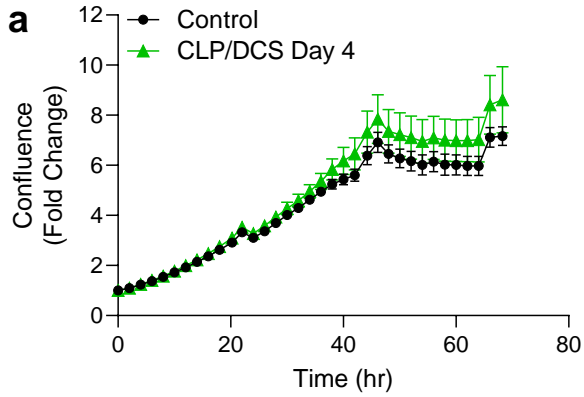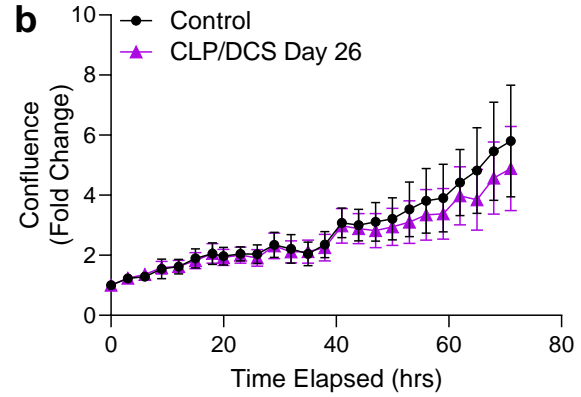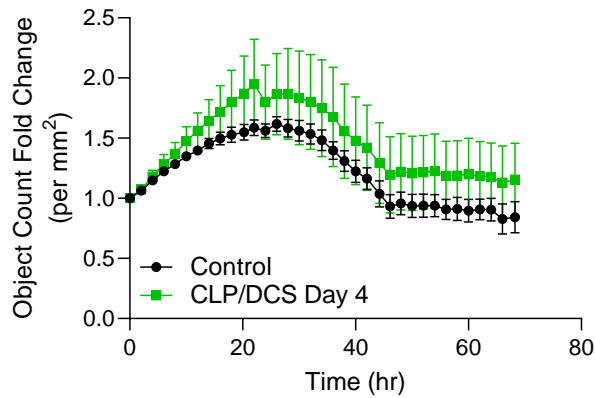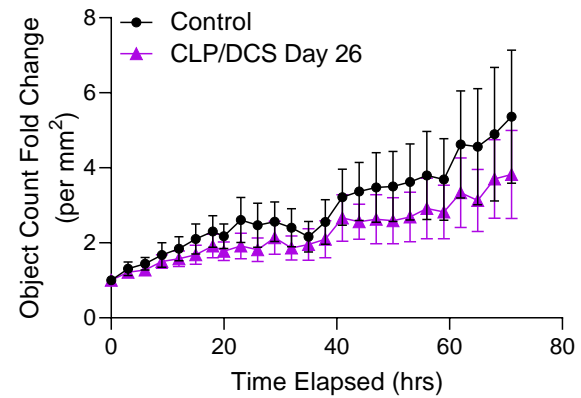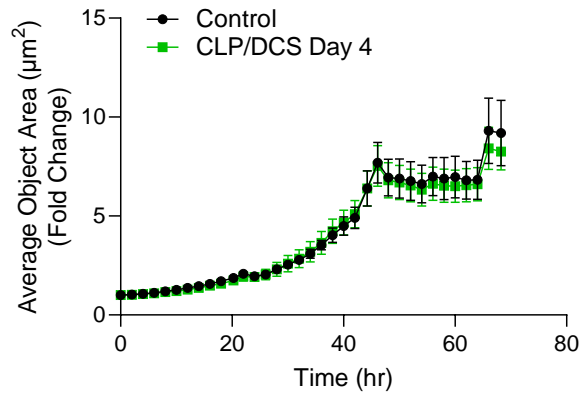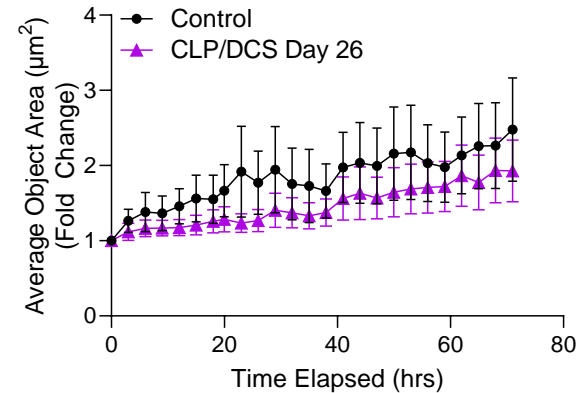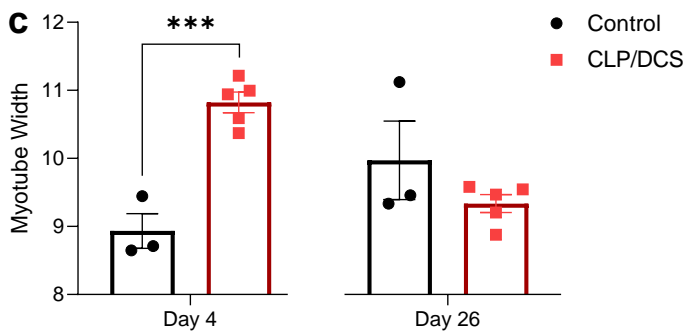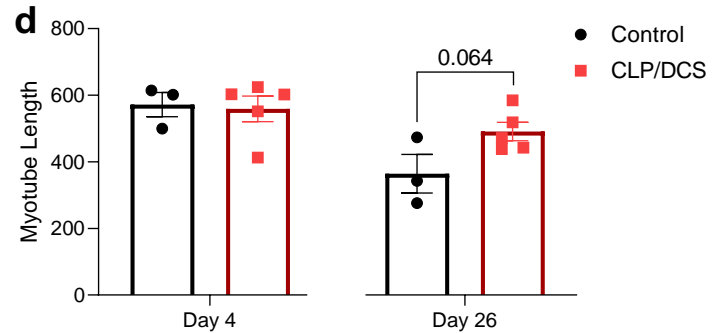

**Supplemental Figure 6. Satellite cells isolated from post sepsis mice do not have drastic alterations in their differentiation capacity.** (A) Muscle stem cell (MuSC) differentiation in control and 3 days after CLP surgery (day 4). Quantification over time of MuSC (top) confluence, (middle) object count, and (bottom) object area fold changes. (B) Control and day 26 CLP/DCS proliferation measurements of MuSCs, with quantification of (top) confluence, (middle) object count, and (bottom) object area fold changes. (C-D) Myotube width and length from control or CLP/DCS differentiated MuSCs at day 4 or day 26. A - B = Two-way ANOVA with BMC. C - D = Student's unpaired t-test. Significance is \* $p < 0.05$ , \*\* $p < 0.01$ , \*\*\* $p < 0.001$ . N = 2-5. Each n = satellite cells isolated from a single mouse.

# Supplemental Figure 7

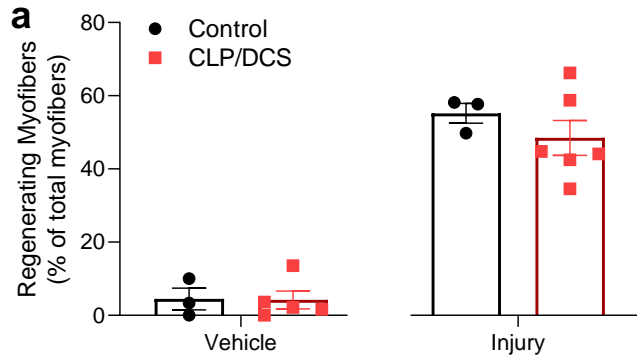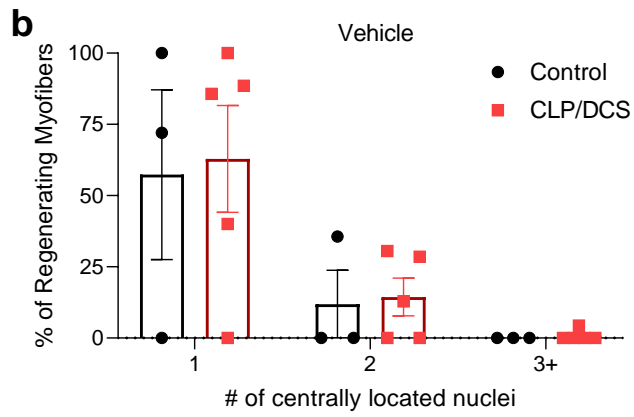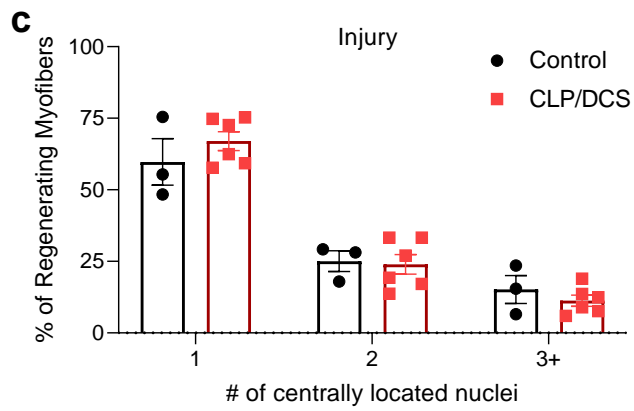

**Supplemental Figure 7. The percentage of regenerating myofibers and number of centrally located nuclei are not altered post-second muscle injury in sepsis recovered mice.** (A) The percentages of regenerating myofibers in vehicle and injury control or CLP/DCS mice. (B-C) Percentage of regenerating fibers containing 1, 2, or 3+ centrally located nuclei in control and CLP/DCS mice for (B) vehicle treated or (C) injury treated TA's. A - C = Student's unpaired t-test where all values are not significant ( $p > 0.05$ ). N = 3-6. Each n = one mouse.

# Supplemental Figure 8

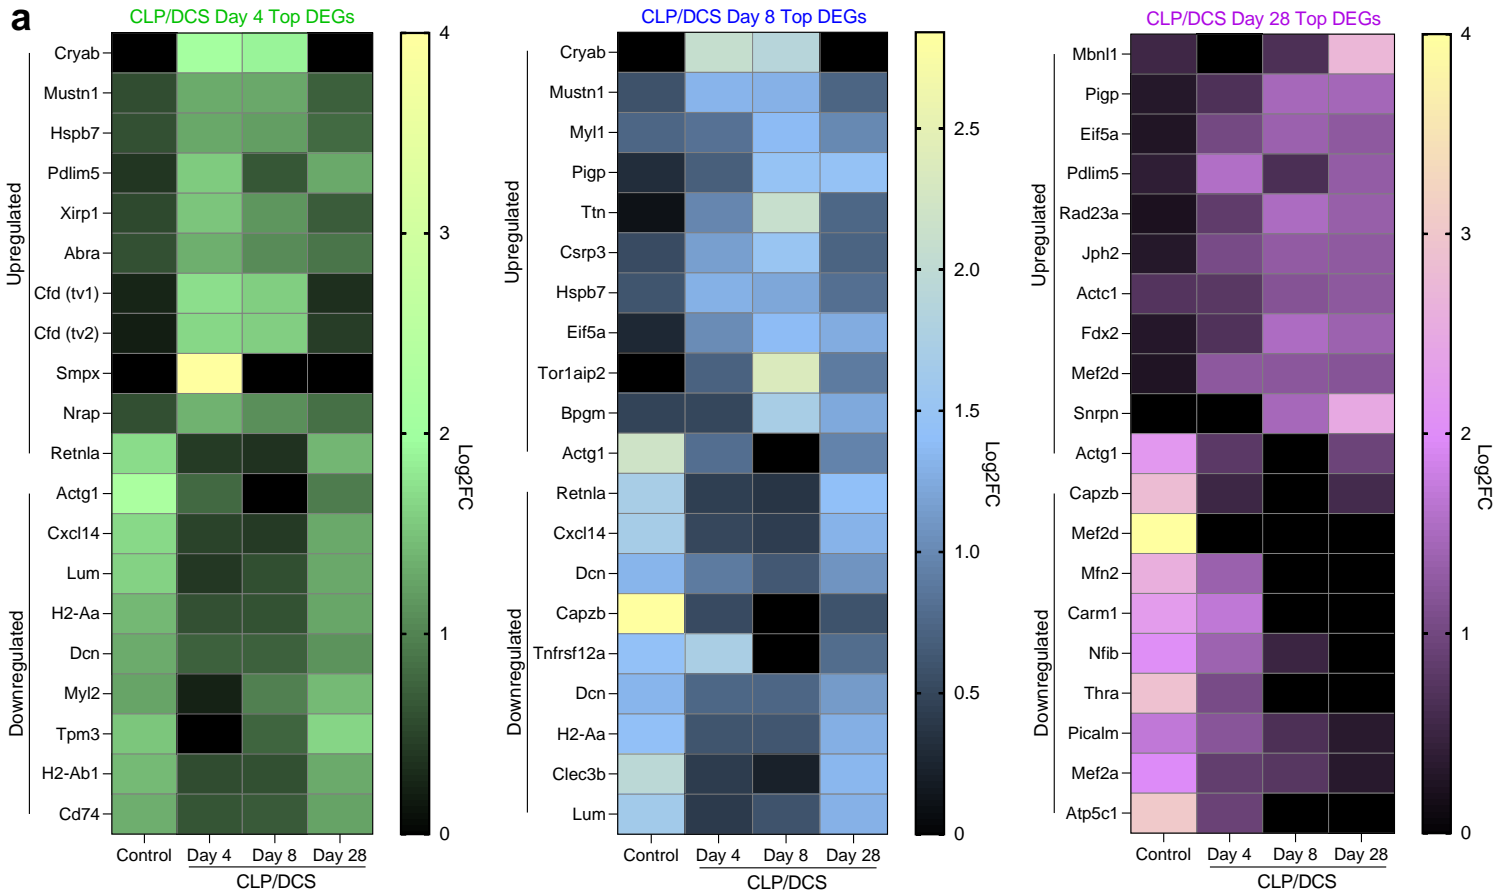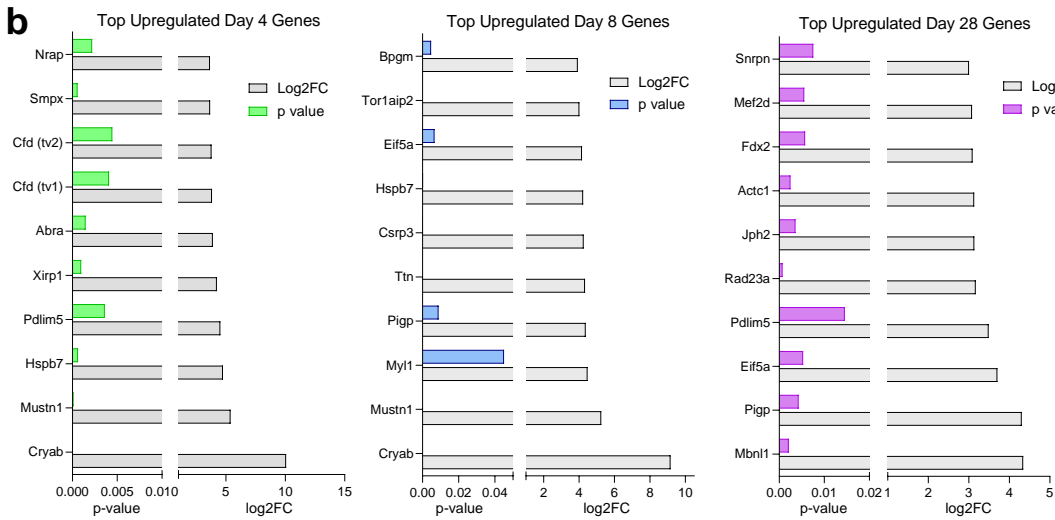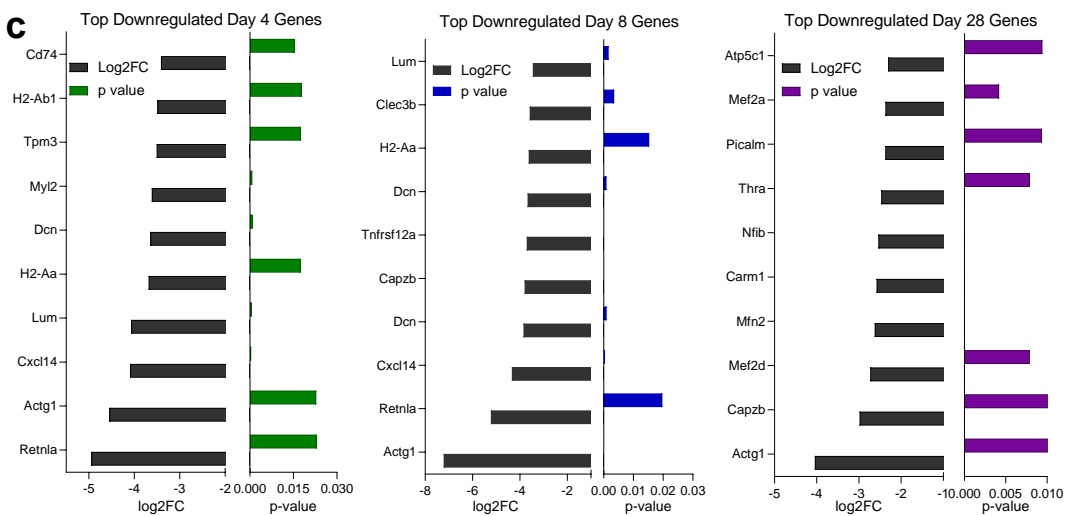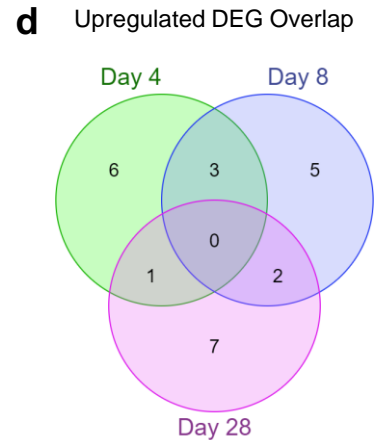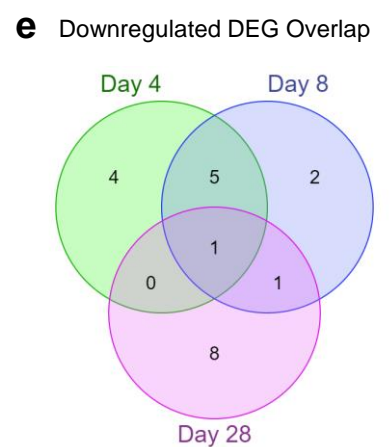

**Supplemental Figure 8. Differentially expressed genes in CLP/DCS day 4, 8, and 28 versus control.** Combined experimental (A) heatmaps depicting expression of the top ten upregulated and top ten downregulated differentially expressed genes (DEGs) for CLP/DCS day 4, 8, and 28 versus control. (B-C) Log<sub>2</sub>FC and negative log p-values for top upregulated (B) and downregulated (C) DEGs in CLP/DCS day 4, 8, and 28 versus control from A. (D-E) Venn diagram illustrating the overlapping upregulated (D) or downregulated (E) DEGs in CLP/DCS day 4, 8, and 28 versus control. Each n = pooled satellite cells isolated from 2-3 mice. Satellite cells harvested from mice on day 27 or 28 are labeled as day 28. Top DEGs were defined by: Day 4 = p-value < 0.05 and -1.75 > LOG<sub>2</sub>FC > 1.75; Day 8 = p-value < 0.05 and -2 > LOG<sub>2</sub>FC > 2; Day 28 = p-value < 0.05 and -1.25 > LOG<sub>2</sub>FC > 1.25.



# Supplemental Figure 9

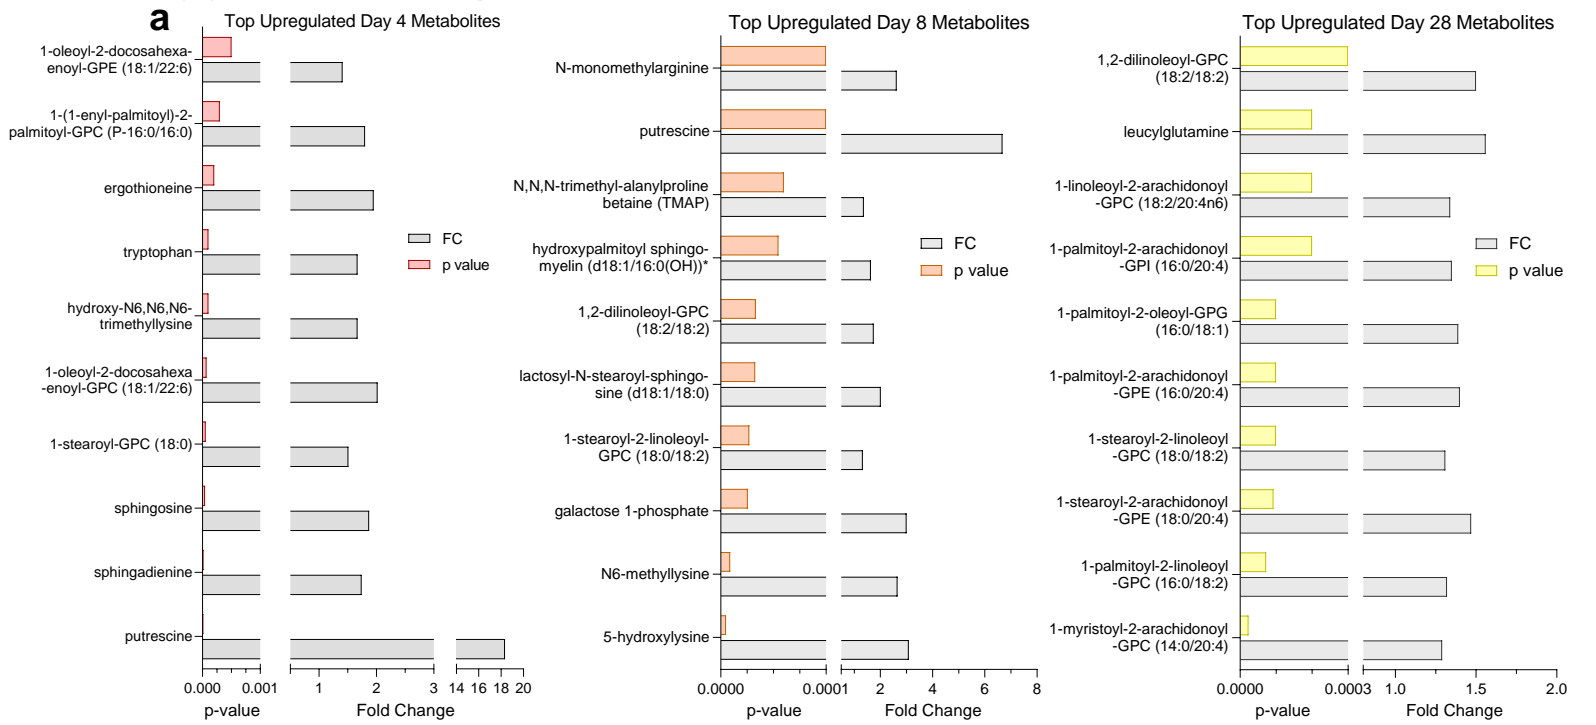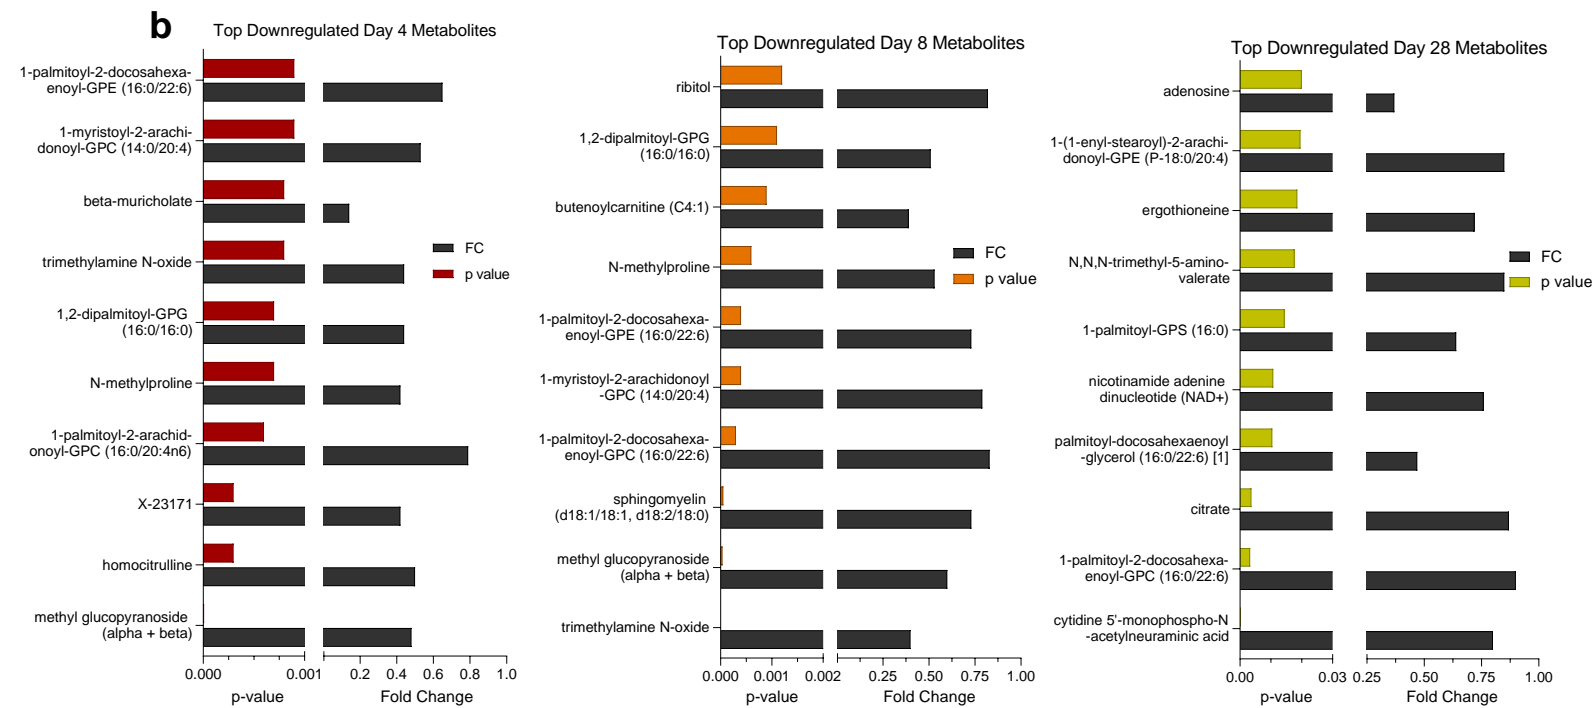

**c** Upregulated Metabolite Overlap

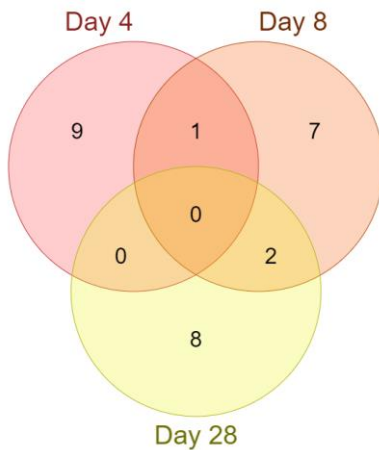

**d** Downregulated Metabolite Overlap

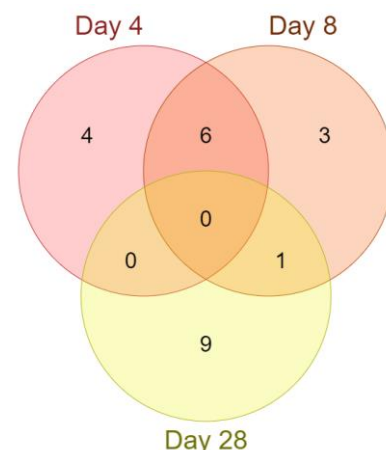

**Supplemental Figure 9. Metabolite changes in gastrocnemius from CLP/DCS day 4, 8, and 28 versus control.** Combined experimental (A-B) scaled intensity fold change and p-values for the top ten upregulated (A) and top ten downregulated (B) metabolites in whole GR muscle from CLP/DCS day 4, 8, and 28 versus control. (C-D) Venn diagram illustrating the overlapping upregulated (C) or downregulated (D) top altered metabolites from A in CLP/DCS day 4, 8, and 28 versus control. GRs that were harvested on day 27 or 28 are labeled as day 28. Top metabolites determined via Student's unpaired t-test with Welch's correction (Metabolon),  $p < 0.05$ . N = 6 per group. Each n = one mouse.

# Supplemental Figure 10

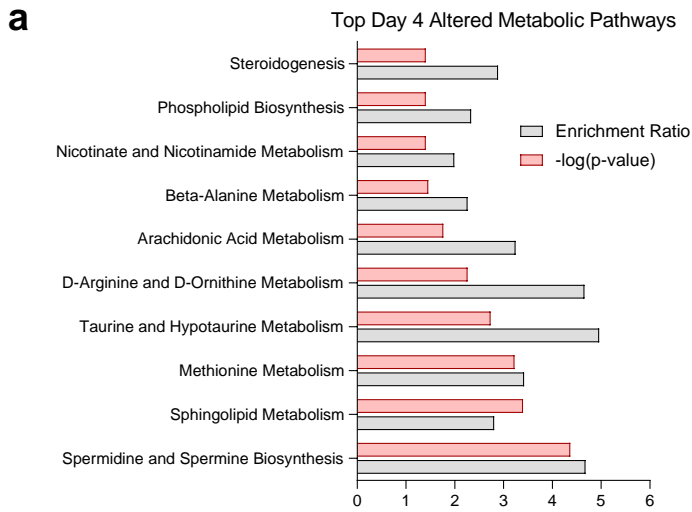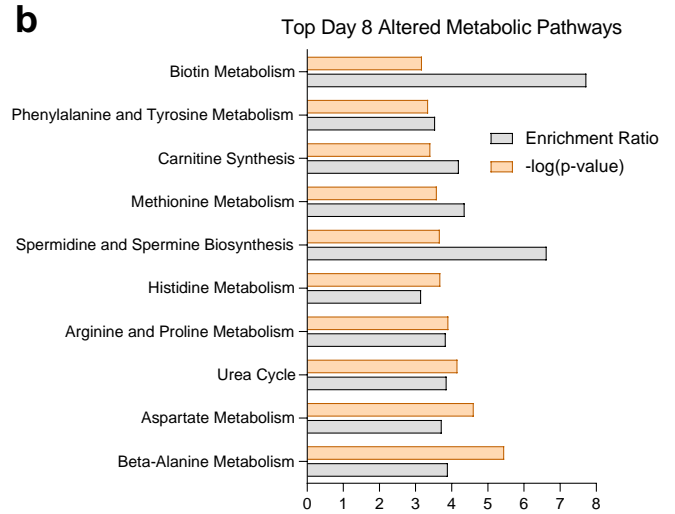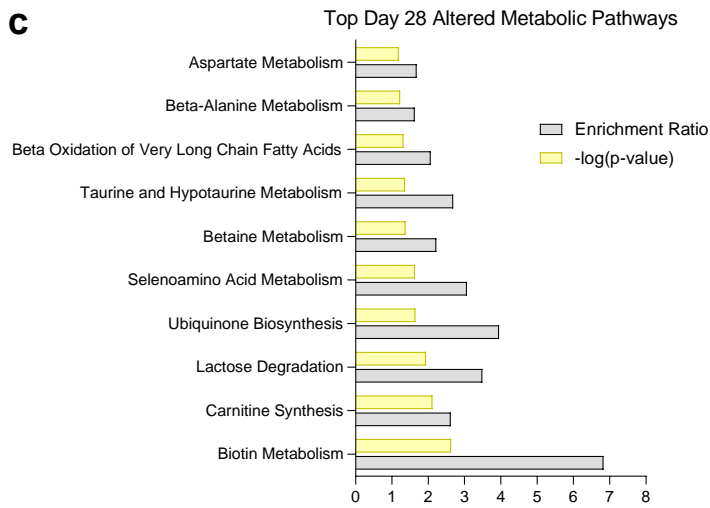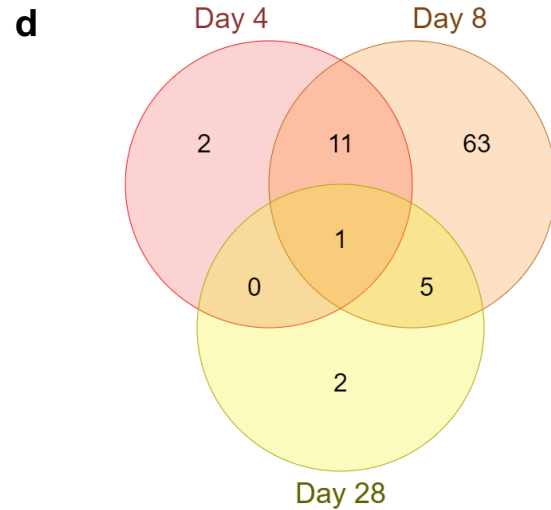

**Supplemental Figure 10. Longitudinal altered metabolic pathways in post-CLP/DCS mice gastrocnemius.** Combined experimental (A-C) top altered metabolic pathways enrichment ratios and negative log p-values from GR CLP/DCS day 4 (A), day 8 (B), and day 28 (C) versus control. (D) Venn diagram depicting overlapping top altered metabolic pathways. GRs that were harvested on day 27 or 28 are labeled as day 28. N = 6 per group. Each n = one mouse.

## Supplemental Tables

| P-values  | Control | Day 4  | Day 8  | Day 26- 28 |
|-----------|---------|--------|--------|------------|
| Control   |         | 0.4093 | 0.0021 | 0.4691     |
| Day 4     | 0.4093  |        | 0.0111 | 0.9023     |
| Day 8     | 0.0021  | 0.0111 |        | 0.0078     |
| Day 26-28 | 0.4691  | 0.9023 | 0.0078 |            |

**Supplemental Table 1.** p-values from nonlinear fit pairwise comparisons of minimum feret diameter means from control, day 4, day 8, and day 28 myofibers from figure 1E.

| Time                                                                                                                                                    | Comparison          | Adjusted p-value |
|---------------------------------------------------------------------------------------------------------------------------------------------------------|---------------------|------------------|
| Day 4                                                                                                                                                   | Control vs. CLP     | <0.0001          |
|                                                                                                                                                         | Control vs. CLP/DCS | <0.0001          |
|                                                                                                                                                         | CLP vs. CLP/DCS     | >0.9999          |
| Day 7                                                                                                                                                   | Control vs. CLP     | <0.0001          |
|                                                                                                                                                         | Control vs. CLP/DCS | <0.0001          |
|                                                                                                                                                         | CLP vs. CLP/DCS     | >0.9999          |
| Day 10                                                                                                                                                  | Control vs. CLP     | <0.0001          |
|                                                                                                                                                         | Control vs. CLP/DCS | <0.0001          |
|                                                                                                                                                         | CLP vs. CLP/DCS     | >0.9999          |
| Day 13                                                                                                                                                  | Control vs. CLP     | <0.0001          |
|                                                                                                                                                         | Control vs. CLP/DCS | <0.0001          |
|                                                                                                                                                         | CLP vs. CLP/DCS     | 0.7314           |
| Day 17                                                                                                                                                  | Control vs. CLP     | <0.0001          |
|                                                                                                                                                         | Control vs. CLP/DCS | 0.0002           |
|                                                                                                                                                         | CLP vs. CLP/DCS     | 0.0269           |
| Day 20                                                                                                                                                  | Control vs. CLP     | <0.0001          |
|                                                                                                                                                         | Control vs. CLP/DCS | 0.0005           |
|                                                                                                                                                         | CLP vs. CLP/DCS     | 0.1302           |
| Day 23                                                                                                                                                  | Control vs. CLP     | <0.0001          |
|                                                                                                                                                         | Control vs. CLP/DCS | 0.0065           |
|                                                                                                                                                         | CLP vs. CLP/DCS     | 0.0809           |
| Day 26                                                                                                                                                  | Control vs. CLP     | 0.0005           |
|                                                                                                                                                         | Control vs. CLP/DCS | 0.0361           |
|                                                                                                                                                         | CLP vs. CLP/DCS     | 0.5489           |
| <b>Supplemental Table 2.</b> Longitudinal fat mass p-values from two-way ANOVA with BMC between control, CLP, and CLP/DCS from supplementary figure 2C. |                     |                  |

| Time                                                                                                                                                     | Comparison          | Adjusted p-value |
|----------------------------------------------------------------------------------------------------------------------------------------------------------|---------------------|------------------|
| Day 4                                                                                                                                                    | Control vs. CLP     | <0.0001          |
|                                                                                                                                                          | Control vs. CLP/DCS | <0.0001          |
|                                                                                                                                                          | CLP vs. CLP/DCS     | >0.9999          |
| Day 7                                                                                                                                                    | Control vs. CLP     | 0.0002           |
|                                                                                                                                                          | Control vs. CLP/DCS | <0.0001          |
|                                                                                                                                                          | CLP vs. CLP/DCS     | 0.0896           |
| Day 10                                                                                                                                                   | Control vs. CLP     | 0.4154           |
|                                                                                                                                                          | Control vs. CLP/DCS | 0.0005           |
|                                                                                                                                                          | CLP vs. CLP/DCS     | 0.0499           |
| Day 13                                                                                                                                                   | Control vs. CLP     | >0.9999          |
|                                                                                                                                                          | Control vs. CLP/DCS | 0.1933           |
|                                                                                                                                                          | CLP vs. CLP/DCS     | 0.9850           |
| Day 17                                                                                                                                                   | Control vs. CLP     | >0.9999          |
|                                                                                                                                                          | Control vs. CLP/DCS | >0.9999          |
|                                                                                                                                                          | CLP vs. CLP/DCS     | >0.9999          |
| Day 20                                                                                                                                                   | Control vs. CLP     | >0.9999          |
|                                                                                                                                                          | Control vs. CLP/DCS | >0.9999          |
|                                                                                                                                                          | CLP vs. CLP/DCS     | 0.5624           |
| Day 23                                                                                                                                                   | Control vs. CLP     | >0.9999          |
|                                                                                                                                                          | Control vs. CLP/DCS | >0.9999          |
|                                                                                                                                                          | CLP vs. CLP/DCS     | >0.9999          |
| Day 26                                                                                                                                                   | Control vs. CLP     | 0.5578           |
|                                                                                                                                                          | Control vs. CLP/DCS | >0.9999          |
|                                                                                                                                                          | CLP vs. CLP/DCS     | >0.9999          |
| <b>Supplemental Table 3.</b> Longitudinal lean mass p-values from two-way ANOVA with BMC between control, CLP, and CLP/DCS from supplementary figure 2D. |                     |                  |

| Time   | Comparison                              | Adjusted p-value |
|--------|-----------------------------------------|------------------|
| Day 4  | Control Vehicle vs. Control Tamoxifen   | >0.9999          |
|        | Control Vehicle vs. CLP/DCS Vehicle     | 0.0034           |
|        | Control Vehicle vs. CLP/DCS Tamoxifen   | <0.0001          |
|        | Control Tamoxifen vs. CLP/DCS Vehicle   | 0.0007           |
|        | Control Tamoxifen vs. CLP/DCS Tamoxifen | <0.0001          |
|        | CLP/DCS Vehicle vs. CLP/DCS Tamoxifen   | 0.6269           |
| Day 7  | Control Vehicle vs. Control Tamoxifen   | >0.9999          |
|        | Control Vehicle vs. CLP/DCS Vehicle     | 0.0296           |
|        | Control Vehicle vs. CLP/DCS Tamoxifen   | 0.0002           |
|        | Control Tamoxifen vs. CLP/DCS Vehicle   | 0.0171           |
|        | Control Tamoxifen vs. CLP/DCS Tamoxifen | 0.0001           |
|        | CLP/DCS Vehicle vs. CLP/DCS Tamoxifen   | 0.9821           |
| Day 10 | Control Vehicle vs. Control Tamoxifen   | >0.9999          |
|        | Control Vehicle vs. CLP/DCS Vehicle     | 0.9318           |
|        | Control Vehicle vs. CLP/DCS Tamoxifen   | 0.0011           |
|        | Control Tamoxifen vs. CLP/DCS Vehicle   | >0.9999          |
|        | Control Tamoxifen vs. CLP/DCS Tamoxifen | 0.0052           |
|        | CLP/DCS Vehicle vs. CLP/DCS Tamoxifen   | 0.0629           |
| Day 14 | Control Vehicle vs. Control Tamoxifen   | >0.9999          |
|        | Control Vehicle vs. CLP/DCS Vehicle     | >0.9999          |
|        | Control Vehicle vs. CLP/DCS Tamoxifen   | 0.0015           |
|        | Control Tamoxifen vs. CLP/DCS Vehicle   | >0.9999          |
|        | Control Tamoxifen vs. CLP/DCS Tamoxifen | 0.0080           |
|        | CLP/DCS Vehicle vs. CLP/DCS Tamoxifen   | 0.0665           |
| Day 19 | Control Vehicle vs. Control Tamoxifen   | >0.9999          |
|        | Control Vehicle vs. CLP/DCS Vehicle     | 0.4899           |
|        | Control Vehicle vs. CLP/DCS Tamoxifen   | 0.0032           |
|        | Control Tamoxifen vs. CLP/DCS Vehicle   | >0.9999          |
|        | Control Tamoxifen vs. CLP/DCS Tamoxifen | 0.0231           |
|        | CLP/DCS Vehicle vs. CLP/DCS Tamoxifen   | 0.3374           |
| Day 27 | Control Vehicle vs. Control Tamoxifen   | >0.9999          |
|        | Control Vehicle vs. CLP/DCS Vehicle     | >0.9999          |
|        | Control Vehicle vs. CLP/DCS Tamoxifen   | 0.0277           |
|        | Control Tamoxifen vs. CLP/DCS Vehicle   | >0.9999          |
|        | Control Tamoxifen vs. CLP/DCS Tamoxifen | 0.0884           |
|        | CLP/DCS Vehicle vs. CLP/DCS Tamoxifen   | 0.2441           |

**Supplemental Table 4.** Longitudinal p-values from two-way ANOVA with BMC of lean mass between control vehicle, control tamoxifen, CLP/DCS vehicle, and CLP/DCS tamoxifen from figure 2B.



| <b>P-values</b>   | <b>Control Vehicle</b> | <b>Control Tamoxifen</b> | <b>CLP/DCS Vehicle</b> | <b>CLP/DCS Tamoxifen</b> |
|-------------------|------------------------|--------------------------|------------------------|--------------------------|
| Control Vehicle   |                        | 0.2448                   | 0.3057                 | 0.0066                   |
| Control Tamoxifen | 0.2448                 |                          | 0.0191                 | 0.0558                   |
| CLP/DCS Vehicle   | 0.3057                 | 0.0191                   |                        | 0.0001                   |
| CLP/DCS Tamoxifen | 0.0066                 | 0.0558                   | 0.0001                 |                          |

**Supplemental Table 5.** p-values from nonlinear fit pairwise comparisons of minimum feret diameter means from control vehicle, control tamoxifen, CLP/DCS vehicle, and CLP/DCS tamoxifen myofibers from figure 2C.

| P-values        | Control Vehicle | Control Injured | CLP/DCS Vehicle | CLP/DCS Injured |
|-----------------|-----------------|-----------------|-----------------|-----------------|
| Control Vehicle |                 | 0.3072          | 0.7802          | 0.0003          |
| Control Injured | 0.3072          |                 | 0.5016          | 0.0029          |
| CLP/DCS Vehicle | 0.7802          | 0.5016          |                 | 0.0015          |
| CLP/DCS Injured | 0.0003          | 0.0029          | 0.0015          |                 |

**Supplemental Table 6.** p-values from nonlinear fit pairwise comparisons of minimum feret diameter means from control vehicle, control injured, CLP/DCS vehicle, and CLP/DCS injured myofibers from figure 4B.

| Ingenuity Canonical Pathways                         | -log(p-value) | Ratio  | z-score |
|------------------------------------------------------|---------------|--------|---------|
| Polyamine Regulation in Colon Cancer                 | 23            | 0.403  | #NUM!   |
| FAT10 Signaling Pathway                              | 22.8          | 0.429  | #NUM!   |
| BAG2 Signaling Pathway                               | 19.2          | 0.298  | #NUM!   |
| Protein Ubiquitination Pathway                       | 17.1          | 0.142  | #NUM!   |
| Inhibition of ARE-Mediated mRNA Degradation Pathway  | 12.9          | 0.161  | 1       |
| Huntington's Disease Signaling                       | 11.4          | 0.114  | #NUM!   |
| Hepatic Fibrosis / Hepatic Stellate Cell Activation  | 10.2          | 0.129  | #NUM!   |
| p38 MAPK Signaling                                   | 6.32          | 0.127  | 1.941   |
| Atherosclerosis Signaling                            | 5.77          | 0.115  | #NUM!   |
| Actin Cytoskeleton Signaling                         | 5.65          | 0.0857 | 1.069   |
| Calcium Signaling                                    | 5.33          | 0.088  | 0.707   |
| ILK Signaling                                        | 5.28          | 0.0909 | 0.775   |
| Dilated Cardiomyopathy Signaling Pathway             | 5.14          | 0.103  | 0.277   |
| Glycogen Biosynthesis II (from UDP-D-Glucose)        | 4.81          | 0.571  | 1       |
| Agranulocyte Adhesion and Diapedesis                 | 4.27          | 0.0794 | #NUM!   |
| PAK Signaling                                        | 4.19          | 0.102  | 0.333   |
| Neuroprotective Role of THOP1 in Alzheimer's Disease | 4.19          | 0.102  | -1.667  |
| Glucocorticoid Receptor Signaling                    | 4.13          | 0.0551 | #NUM!   |
| Tumor Microenvironment Pathway                       | 4.1           | 0.0838 | -1.069  |
| ERK5 Signaling                                       | 3.97          | 0.125  | 1.414   |
| ERK/MAPK Signaling                                   | 3.75          | 0.0748 | 1.387   |
| Cholecystokinin/Gastrin-mediated Signaling           | 3.52          | 0.0924 | 0.333   |
| Sertoli Cell-Sertoli Cell Junction Signaling         | 3.43          | 0.0728 | #NUM!   |
| HIF1 $\alpha$ Signaling                              | 3.38          | 0.0721 | 0       |
| Cardiac Hypertrophy Signaling                        | 3.3           | 0.0659 | 0.535   |

**Supplemental Table 7.** Top 25 altered pathways from IPA analysis of RNA sequencing data from CLP/DCS day 4 post-septic satellite cells versus control (DEGs: p-value < 0.05 and  $-1.75 > \text{LOG}_2\text{FC} > 1.75$ ).

| Ingenuity Canonical Pathways                        | -log(p-value) | Ratio | z-score |
|-----------------------------------------------------|---------------|-------|---------|
| Oxidative Phosphorylation                           | 49.7          | 0.536 | 7.421   |
| Mitochondrial Dysfunction                           | 48.6          | 0.409 | #NUM!   |
| Sirtuin Signaling Pathway                           | 22.3          | 0.202 | -3.162  |
| Estrogen Receptor Signaling                         | 17.7          | 0.156 | 2.263   |
| Glucocorticoid Receptor Signaling                   | 16.2          | 0.129 | #NUM!   |
| Calcium Signaling                                   | 9.93          | 0.157 | 3.441   |
| Dilated Cardiomyopathy Signaling Pathway            | 8.92          | 0.178 | -1.606  |
| TCA Cycle II (Eukaryotic)                           | 8.76          | 0.458 | 3.317   |
| Glycolysis I                                        | 7.31          | 0.4   | 3.162   |
| Gluconeogenesis I                                   | 7.31          | 0.4   | 3.162   |
| Protein Ubiquitination Pathway                      | 7.18          | 0.124 | #NUM!   |
| ILK Signaling                                       | 6.69          | 0.136 | 1.877   |
| Hepatic Fibrosis / Hepatic Stellate Cell Activation | 6.32          | 0.134 | #NUM!   |
| Huntington's Disease Signaling                      | 6             | 0.114 | 1.134   |
| Cellular Effects of Sildenafil (Viagra)             | 5.58          | 0.141 | #NUM!   |
| Actin Cytoskeleton Signaling                        | 5.36          | 0.114 | 3.273   |
| HIF1 $\alpha$ Signaling                             | 5.24          | 0.12  | 2.041   |
| Agranulocyte Adhesion and Diapedesis                | 4.55          | 0.112 | #NUM!   |
| Role of NFAT in Cardiac Hypertrophy                 | 4.35          | 0.109 | 3.273   |
| Amyotrophic Lateral Sclerosis Signaling             | 4.33          | 0.139 | 0.905   |
| Netrin Signaling                                    | 4.16          | 0.167 | 2.309   |
| Cardiac Hypertrophy Signaling                       | 4.08          | 0.101 | 3.13    |
| Hypoxia Signaling in the Cardiovascular System      | 4.04          | 0.162 | 0.447   |
| Aspartate Degradation II                            | 3.92          | 0.571 | 2       |
| Integrin Signaling                                  | 3.69          | 0.103 | 3.441   |

**Supplemental Table 8.** Top 25 altered pathways from IPA analysis of RNA sequencing data from CLP/DCS day 8 post-septic satellite cells versus control (DEGs: p-value < 0.05 and -2 > LOG2FC > 2).

| Ingenuity Canonical Pathways                            | -log(p-value) | Ratio  | z-score |
|---------------------------------------------------------|---------------|--------|---------|
| Oxidative Phosphorylation                               | 59.1          | 0.527  | 7.353   |
| Mitochondrial Dysfunction                               | 58.7          | 0.398  | #NUM!   |
| Sirtuin Signaling Pathway                               | 27.3          | 0.185  | -4.11   |
| Estrogen Receptor Signaling                             | 20.4          | 0.134  | 2.6     |
| Calcium Signaling                                       | 12.7          | 0.144  | 3.71    |
| Glucocorticoid Receptor Signaling                       | 11.2          | 0.0861 | #NUM!   |
| Glycolysis I                                            | 10.5          | 0.44   | 3.317   |
| Gluconeogenesis I                                       | 10.5          | 0.44   | 3.317   |
| TCA Cycle II (Eukaryotic)                               | 9.3           | 0.417  | 3.162   |
| Dilated Cardiomyopathy Signaling Pathway                | 8.86          | 0.144  | -0.535  |
| Role of NFAT in Cardiac Hypertrophy                     | 8.24          | 0.114  | 4.264   |
| Dopamine-DARPP32 Feedback in cAMP Signaling             | 7.18          | 0.116  | 2.138   |
| Cellular Effects of Sildenafil (Viagra)                 | 5.83          | 0.114  | #NUM!   |
| Cardiac $\beta$ -adrenergic Signaling                   | 5.51          | 0.103  | -0.577  |
| Synaptic Long Term Potentiation                         | 5.32          | 0.116  | 2.138   |
| Cardiac Hypertrophy Signaling                           | 5.19          | 0.0853 | 3.638   |
| nNOS Signaling in Skeletal Muscle Cells                 | 5.1           | 0.188  | #NUM!   |
| Senescence Pathway                                      | 4.72          | 0.0774 | 3.3     |
| Glycogen Biosynthesis II (from UDP-D-Glucose)           | 4.65          | 0.571  | #NUM!   |
| 3-phosphoinositide Degradation                          | 4.47          | 0.0904 | 2.887   |
| HIF1 $\alpha$ Signaling                                 | 4.45          | 0.0865 | 3.771   |
| White Adipose Tissue Browning Pathway                   | 4.4           | 0.103  | 3.207   |
| D-myo-inositol-5-phosphate Metabolism                   | 4.36          | 0.0885 | 2.887   |
| Protein Kinase A Signaling                              | 4.33          | 0.0672 | 1.279   |
| D-myo-inositol (1,4,5,6)-Tetrakisphosphate Biosynthesis | 4.27          | 0.0909 | 2.714   |

**Supplemental Table 9.** Top 25 altered pathways from IPA analysis of RNA sequencing data from day 28 post-septic satellite cells versus control (DEGs: p-value < 0.05 and -1.25 > LOG2FC > 1.25).
